# Supplementary material for: Life cycle assessment of palm oil biodiesel production in Thailand
Source: eLife journal article supplement (doi:10.7554/elife.01257), 2011-01-01

untreated (3 replicates)

$\log_2$  relative occupancy,  
all footprints

-1.5 -0.5 0.5 1.5    -1.0 0.0 1.0 2.0

$\log_2$  small footprint  
abundance

-2 -1 0 1    -2.0 -0.5 0.5 1.5

$\log_2$  large footprint  
abundance

-4 -2 0    -4 -3 -2 -1 0

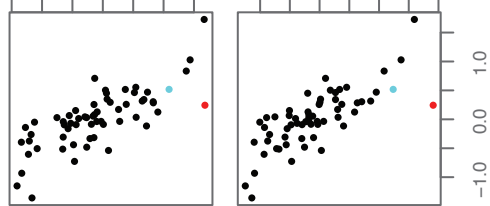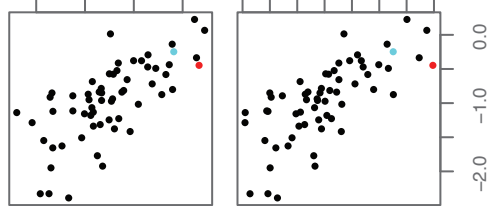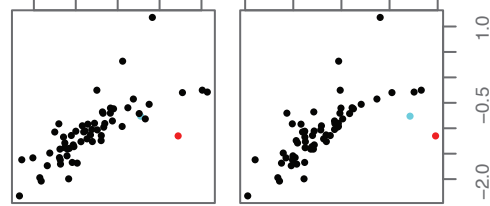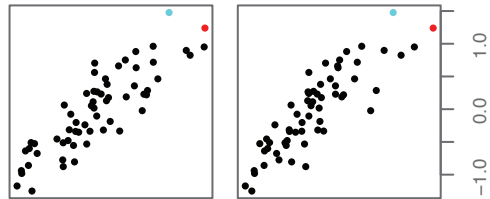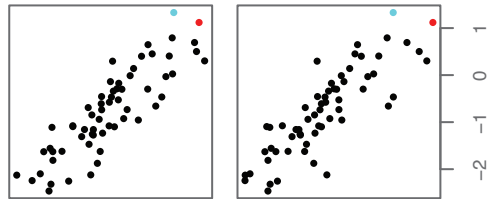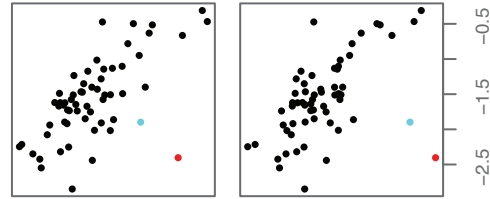

3-AT,  
10 min

3-AT,  
60 min

3-AT,  
10 min

3-AT,  
60 min

3-AT,  
10 min

3-AT,  
60 min

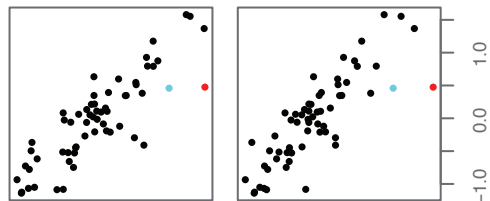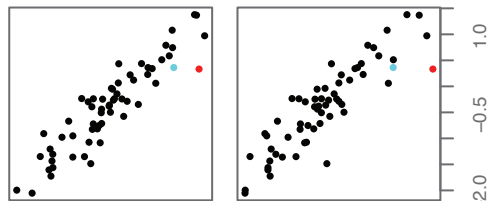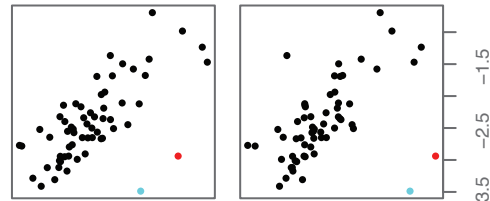

Supplement: supp [file elife_poa_e01257_Figure_4_figure_supplement_1.pdf › elife_poa_e01257_Figure_4_figure_supplement_1.pdf]
