# Supplementary material for: Life cycle assessment of palm oil biodiesel production in Thailand
Source: eLife journal article supplement (doi:10.7554/elife.01257), 2011-01-01

**A****A vs A+1, replicate 1**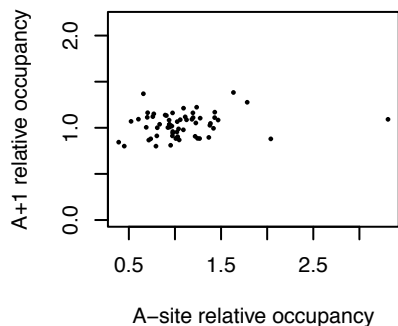**A vs A+1, replicate 2**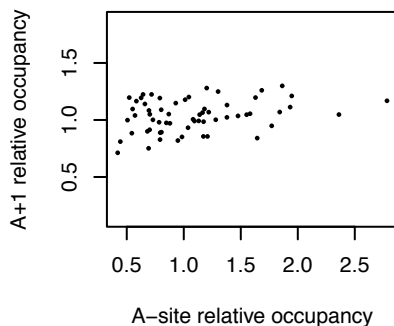**A vs A+1, replicate 3**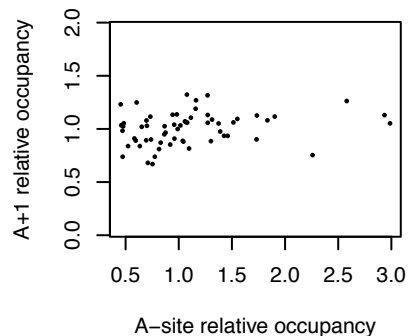**B****A vs A+1 small, replicate 1**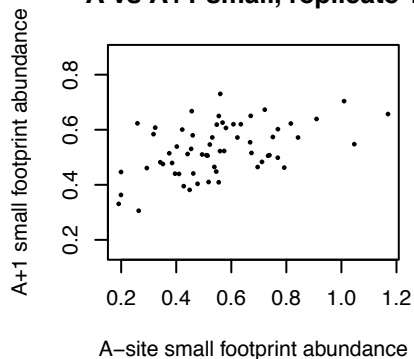**A vs A+1 small, replicate 2**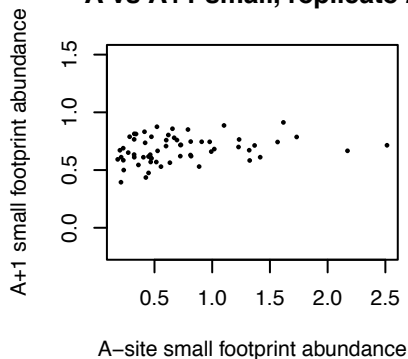**A vs A+1 small, replicate 3**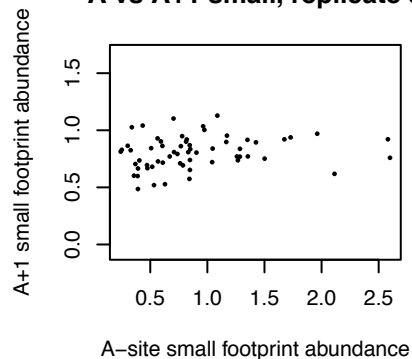**C****A vs A+1 large, replicate 1**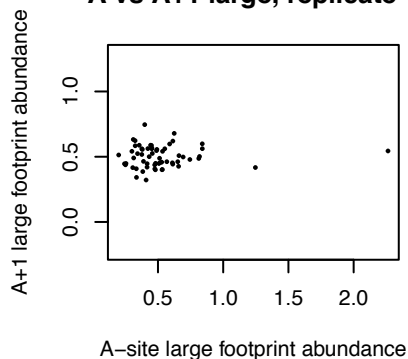**A vs A+1 large, replicate 2**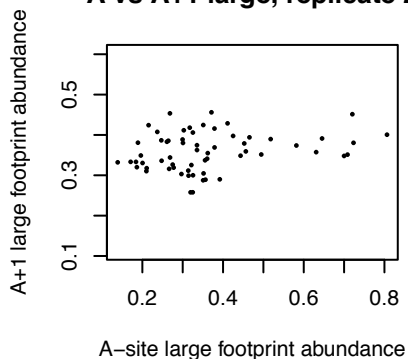**A vs A+1 large, replicate 3**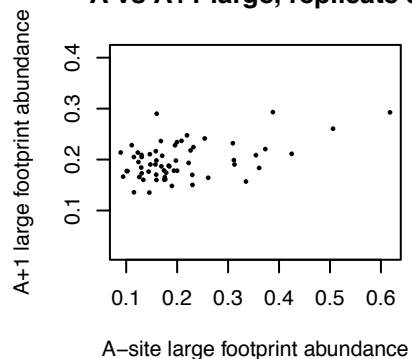

Supplement: supp [file elife_poa_e01257_Figure_5_figure_supplement_1.pdf › elife_poa_e01257_Figure_5_figure_supplement_1.pdf]
