# Supplementary material for: Distinct stages of the translation elongation cycle revealed by sequencing ribosome-protected mRNA fragments
Source: eLife. 2014 May 9;3:e01257. doi: 10.7554/eLife.01257 (PMC4052883; doi:10.7554/eLife.01257)
Supplement: Supplementary file 1. — Primer sequences. DOI: http://dx.doi.org/10.7554/eLife.01257.013 [file elife01257s001.xlsx]

## Sheet: Sheet1
Primer	Sequence
NI-NI-9	[Phos]AGATCGGAAGAGCGTCGTGTAGGGAAAGAGTGTAGATCTCGGTGGTCGC[Sp-C18]CACTCA[Sp-C18]TTCAGACGTGTGCTCTTCCGATCTATTGATGGTGCCTACAG
NI-NI-2	AATGATACGGCGACCACCGAGATCTACAC
Indexing Primer	CAAGCAGAAGACGGCATACGAGATAGTCGTGTGACTGGAGTTCAGACGTGTGCTCTTCCG
Ribosubtract1	GGTGCACAATCGACCGATC
Ribosubtract2	GTTTCTTTACTTATTCAATGAAGCGG
Ribosubtract3	TATAGATGGATACGAATAAGGCGTC
	[Phos] represents 5’-phosphorylation and [Sp-C18] represents a hexa-ethyleneglycol spacer
