# Supplementary figures and images for: Life cycle assessment of palm oil biodiesel production in Thailand
Source: eLife journal article supplement (doi:10.7554/elife.01257), 2011-01-01

### untreated, replicate 2

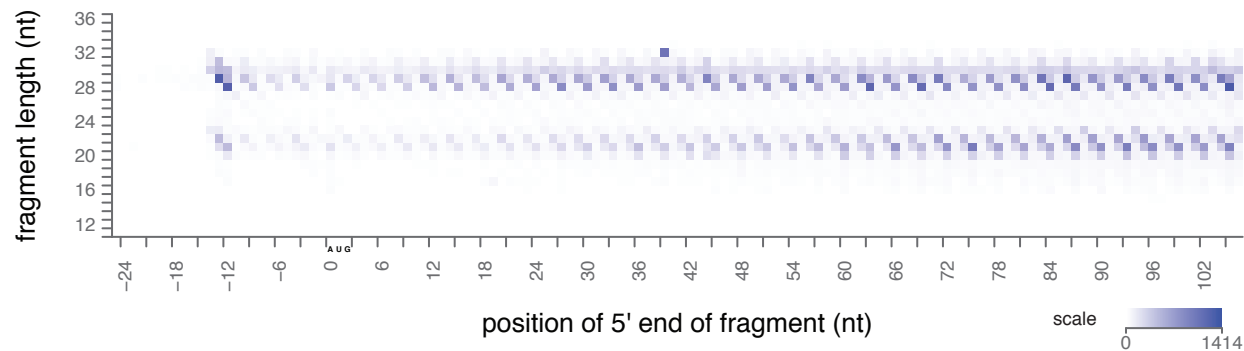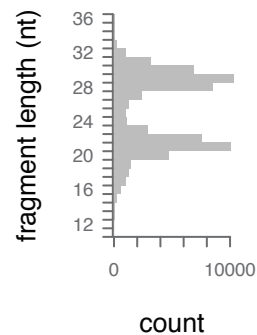

### untreated, replicate 3

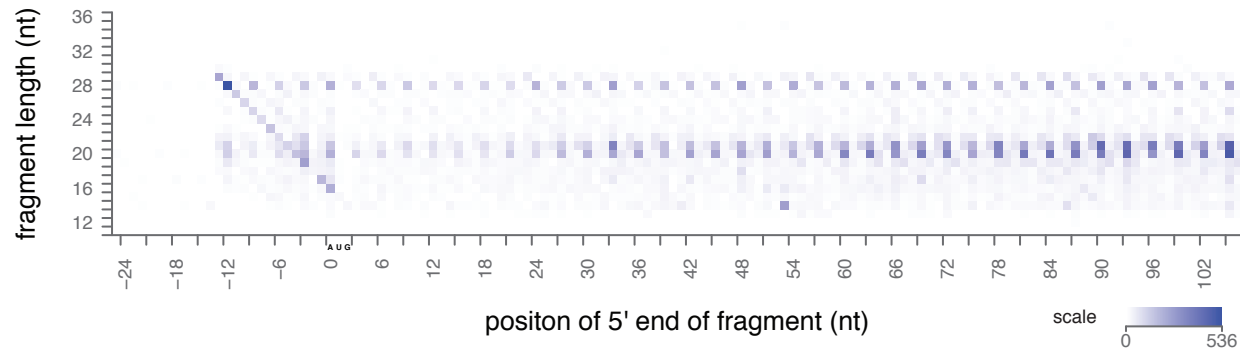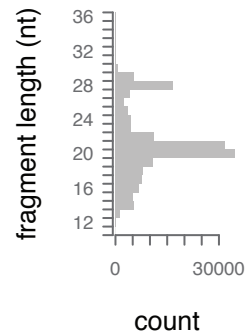

Supplement: supp [file elife_poa_e01257_Figure_2_figure_supplement_1.pdf › elife_poa_e01257_Figure_2_figure_supplement_1.pdf]

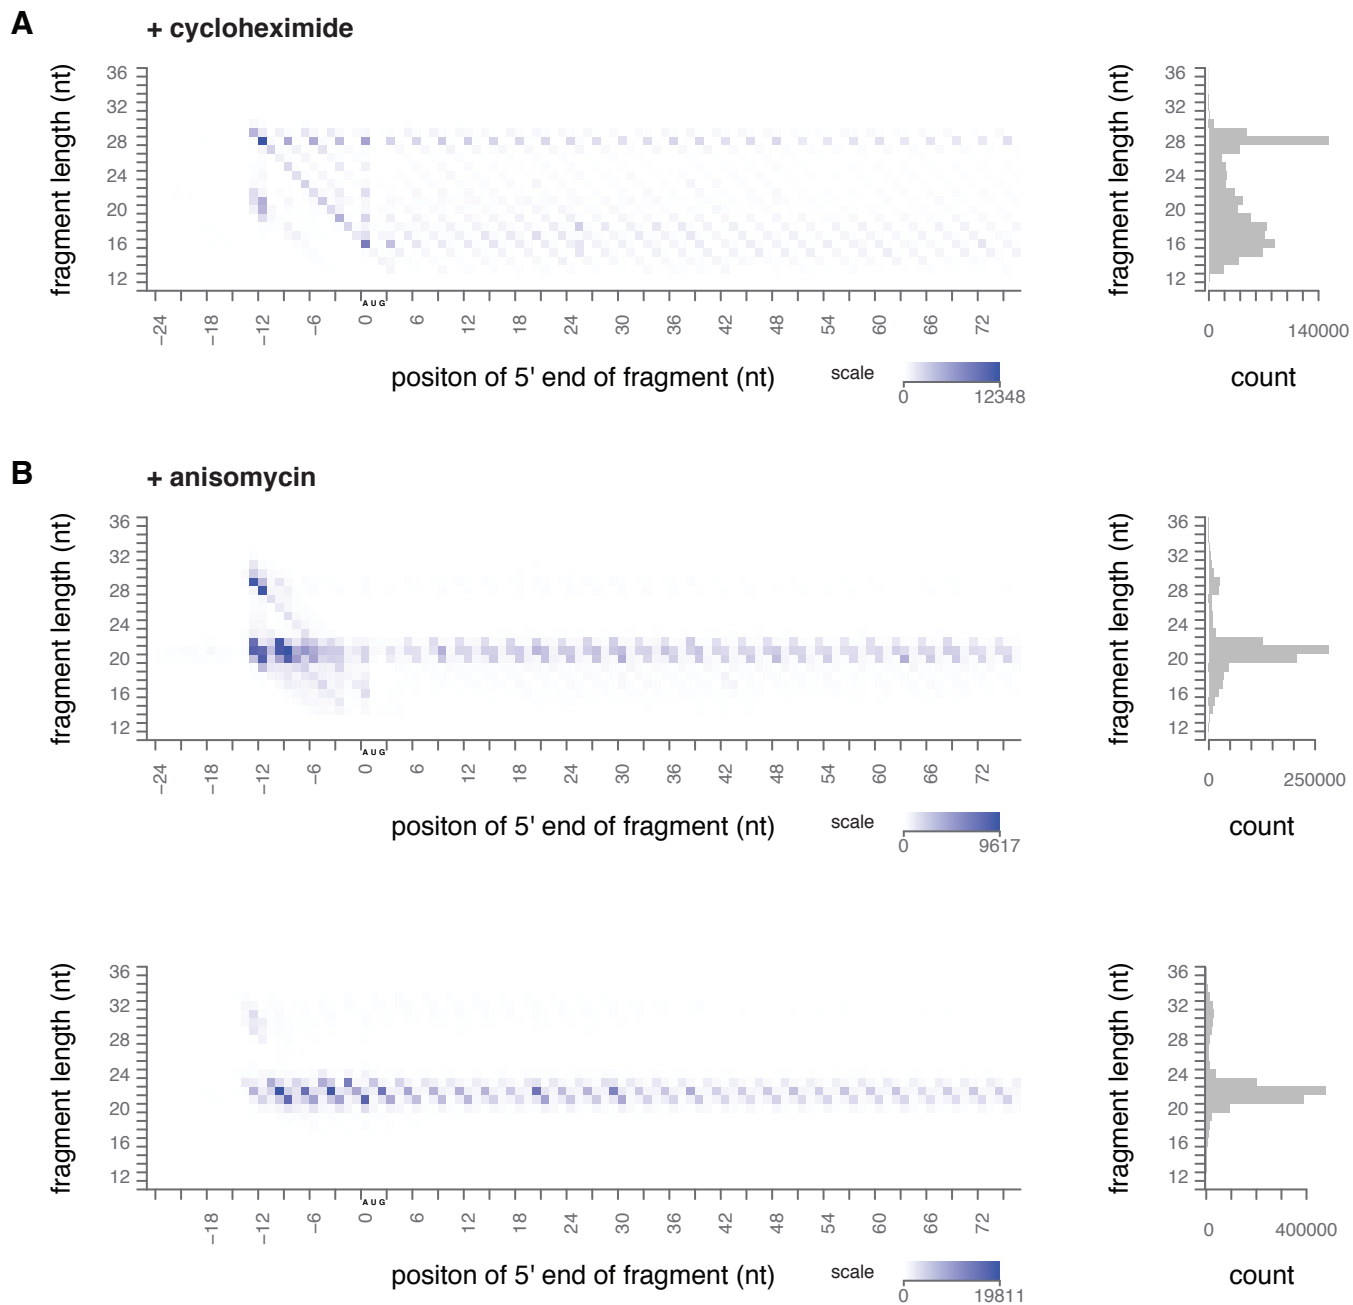

Supplement: supp [file elife_poa_e01257_Figure_3_figure_supplement_1.pdf › elife_poa_e01257_Figure_3_figure_supplement_1.pdf]
